# Supplementary material
Source: Springer Nature journal article supplement (https://www.springermedizin.de/resource/supplementary/12885_2011_2879_MOESM3_ESM.pdf/9462222)

## Testing set (n=86)

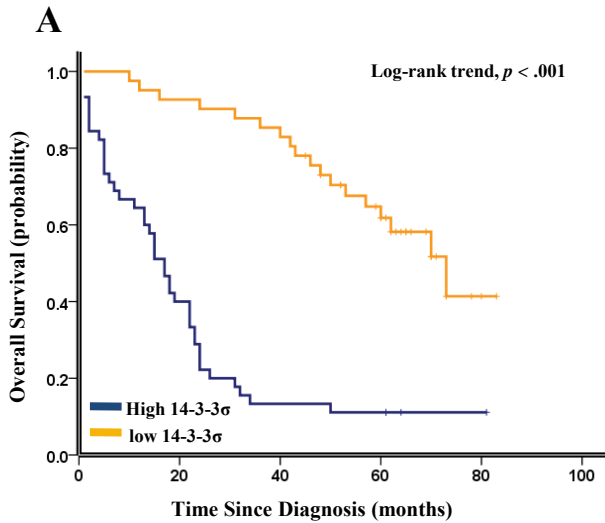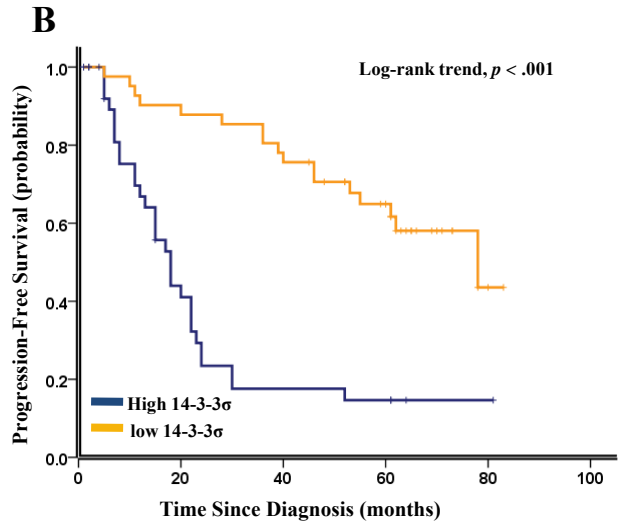

## Overall patients (n=152)

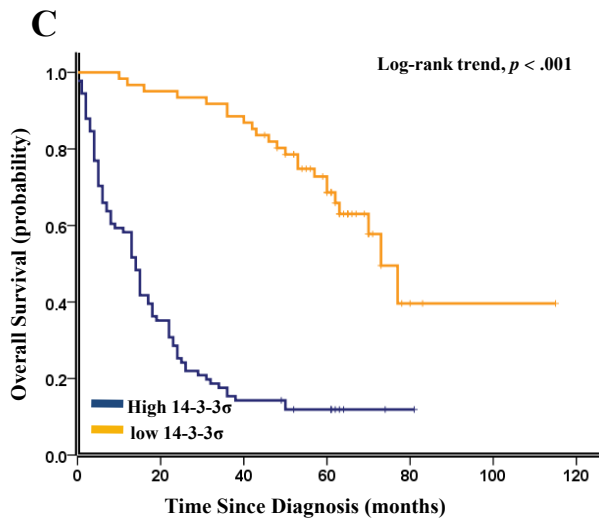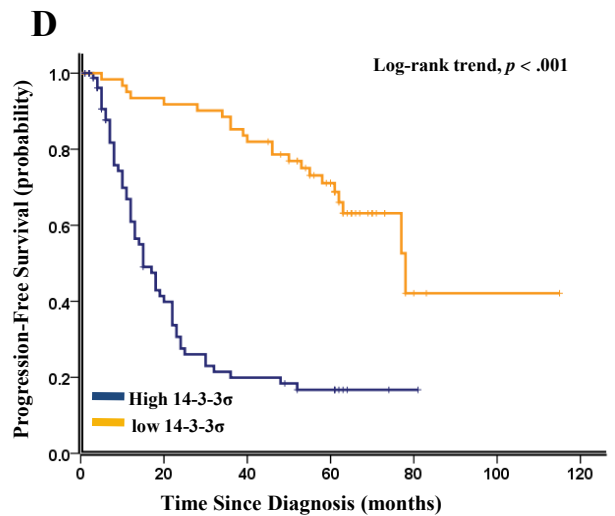

Supplement: MOESM3 [file 9462222]
